# Supplementary material for: Cross-Cultural Adaptation and Validation of the Perceptions of Empowerment in Midwifery Scale in the Spanish Context (PEMS-e)
Source: MDPI journal article supplement (doi:10.3390/healthcare11101464), 2023-05-18
Supplement: s1 [file s1]

Table S2: Scores of Face validity

[illegible]
