# Supplementary material for: Cross-Cultural Adaptation and Validation of the Perceptions of Empowerment in Midwifery Scale in the Spanish Context (PEMS-e)
Source: MDPI journal article supplement (doi:10.3390/healthcare11101464), 2023-05-18
Supplement: s1 [file s1]

Table S3: Measure of Sampling Adequacy of the EFA with 22 items

| Items                                                                                                                                                                                                                                                                                                                                                                                                                                                                                                              | <i>Relative Difficulty Index<br/>(RDI)</i> | <i>Measure of Sampling<br/>Adequacy<br/>(MSA)</i> | Bootstrap 95%<br>Confidence Interval<br>(IC95%) |
|--------------------------------------------------------------------------------------------------------------------------------------------------------------------------------------------------------------------------------------------------------------------------------------------------------------------------------------------------------------------------------------------------------------------------------------------------------------------------------------------------------------------|--------------------------------------------|---------------------------------------------------|-------------------------------------------------|
| Item 10                                                                                                                                                                                                                                                                                                                                                                                                                                                                                                            | 0.51829                                    | 0.93136                                           | 0.800-0.943                                     |
| Item 8                                                                                                                                                                                                                                                                                                                                                                                                                                                                                                             | 0.55427                                    | 0.91170                                           | 0.743-0.926                                     |
| Item 19                                                                                                                                                                                                                                                                                                                                                                                                                                                                                                            | 0.55854                                    | 0.87930                                           | 0-633-0.909                                     |
| Item 6                                                                                                                                                                                                                                                                                                                                                                                                                                                                                                             | 0.58780                                    | 0.92976                                           | 0.765-0.942                                     |
| Item 21                                                                                                                                                                                                                                                                                                                                                                                                                                                                                                            | 0.58902                                    | 0.92834                                           | 0.793-0.939                                     |
| Item 5                                                                                                                                                                                                                                                                                                                                                                                                                                                                                                             | 0.59512                                    | 0.90795                                           | 0.791-0.920                                     |
| Item 9                                                                                                                                                                                                                                                                                                                                                                                                                                                                                                             | 0.59634                                    | 0.93233                                           | 0.774-0.939                                     |
| Item 22                                                                                                                                                                                                                                                                                                                                                                                                                                                                                                            | 0.60000                                    | 0.87372                                           | 0.742-0.900                                     |
| Item 1                                                                                                                                                                                                                                                                                                                                                                                                                                                                                                             | 0.60671                                    | 0.92764                                           | 0.819-0.937                                     |
| Item 16                                                                                                                                                                                                                                                                                                                                                                                                                                                                                                            | 0.61585                                    | 0.86032                                           | 0.719-0.877                                     |
| Item 7                                                                                                                                                                                                                                                                                                                                                                                                                                                                                                             | 0.62622                                    | 0.90185                                           | 0.700-0.919                                     |
| Item 13                                                                                                                                                                                                                                                                                                                                                                                                                                                                                                            | 0.63780                                    | 0.93468                                           | 0.768-0.947                                     |
| Item 20                                                                                                                                                                                                                                                                                                                                                                                                                                                                                                            | 0.64878                                    | 0.90582                                           | 0.756-0.929                                     |
| Item 17                                                                                                                                                                                                                                                                                                                                                                                                                                                                                                            | 0.73720                                    | 0.89190                                           | 0.722-0.917                                     |
| Item 14                                                                                                                                                                                                                                                                                                                                                                                                                                                                                                            | 0.78171                                    | 0.88649                                           | 0.647-0.913                                     |
| Item 12                                                                                                                                                                                                                                                                                                                                                                                                                                                                                                            | 0.82866                                    | 0.85543                                           | 0.511-0.875                                     |
| Item 18                                                                                                                                                                                                                                                                                                                                                                                                                                                                                                            | 0.85427                                    | 0.77645***                                        | 0.493-0.809                                     |
| Item 11                                                                                                                                                                                                                                                                                                                                                                                                                                                                                                            | 0.85915                                    | 0.74261***                                        | 0.445-0.786                                     |
| Item 3                                                                                                                                                                                                                                                                                                                                                                                                                                                                                                             | 0.88659                                    | 0.70732***                                        | 0.376-0.776                                     |
| Item 4                                                                                                                                                                                                                                                                                                                                                                                                                                                                                                             | 0.89817                                    | 0.71425***                                        | 0.411-0.773                                     |
| Item 15                                                                                                                                                                                                                                                                                                                                                                                                                                                                                                            | 0.92866                                    | 0.83565                                           | 0.536-0.857                                     |
| Item 2                                                                                                                                                                                                                                                                                                                                                                                                                                                                                                             | 0.93415                                    | 0.73150***                                        | 0.423-0.792                                     |
| <p>***Number of items proposed to be removed based on MSA: 5</p> <p>Measure of Sampling Adequacy (MSA): Values of MSA below 0.50 suggest that the item does not measure the same domain as the remaining items in the pool, and so that it should be removed.</p> <p>Relative Difficulty Index (RDI): it assesses the position of the items. For a normal-range test, an optimal pool of items should have about 75% RDI values between .40 and .60 and the remaining values evenly distributed in both tails.</p> |                                            |                                                   |                                                 |
