# Supplementary material for: Cross-Cultural Adaptation and Validation of the Perceptions of Empowerment in Midwifery Scale in the Spanish Context (PEMS-e)
Source: MDPI journal article supplement (doi:10.3390/healthcare11101464), 2023-05-18
Supplement: s1 [file s1]

| Número<br>Ítem                                                                                                                                                                                                                                                                                                                                                                                                                                                                                                                                                                                                                                                                                                                                 | Pregunta-Ítem                                                                                                | Totalmente de<br>acuerdo | De<br>acuerdo | Ni de acuerdo ni en<br>desacuerdo | En desacuerdo | Totalmente en<br>desacuerdo |
|------------------------------------------------------------------------------------------------------------------------------------------------------------------------------------------------------------------------------------------------------------------------------------------------------------------------------------------------------------------------------------------------------------------------------------------------------------------------------------------------------------------------------------------------------------------------------------------------------------------------------------------------------------------------------------------------------------------------------------------------|--------------------------------------------------------------------------------------------------------------|--------------------------|---------------|-----------------------------------|---------------|-----------------------------|
| 1                                                                                                                                                                                                                                                                                                                                                                                                                                                                                                                                                                                                                                                                                                                                              | Soy valorada por mi supervisora/dirección                                                                    |                          |               |                                   |               |                             |
| 5                                                                                                                                                                                                                                                                                                                                                                                                                                                                                                                                                                                                                                                                                                                                              | Tengo el respaldo de mi supervisora/dirección                                                                |                          |               |                                   |               |                             |
| 6                                                                                                                                                                                                                                                                                                                                                                                                                                                                                                                                                                                                                                                                                                                                              | Mi supervisora/dirección no reconoce mi contribución al cuidado de las mujeres <sup>R</sup>                  |                          |               |                                   |               |                             |
| 7                                                                                                                                                                                                                                                                                                                                                                                                                                                                                                                                                                                                                                                                                                                                              | Tengo acceso adecuado a los recursos para las mujeres que están bajo mi cuidado                              |                          |               |                                   |               |                             |
| 8                                                                                                                                                                                                                                                                                                                                                                                                                                                                                                                                                                                                                                                                                                                                              | No tengo una supervisora/dirección que me apoye <sup>R</sup>                                                 |                          |               |                                   |               |                             |
| 9                                                                                                                                                                                                                                                                                                                                                                                                                                                                                                                                                                                                                                                                                                                                              | Tengo una comunicación efectiva con la supervisión/dirección                                                 |                          |               |                                   |               |                             |
| 10                                                                                                                                                                                                                                                                                                                                                                                                                                                                                                                                                                                                                                                                                                                                             | No estoy informada sobre los cambios en mi organización que afectarán a mi práctica profesional <sup>R</sup> |                          |               |                                   |               |                             |
| 12                                                                                                                                                                                                                                                                                                                                                                                                                                                                                                                                                                                                                                                                                                                                             | Tengo el apoyo de mis compañeros de trabajo                                                                  |                          |               |                                   |               |                             |
| 13                                                                                                                                                                                                                                                                                                                                                                                                                                                                                                                                                                                                                                                                                                                                             | Tengo la capacidad de decir que no cuando lo considero necesario                                             |                          |               |                                   |               |                             |
| 14                                                                                                                                                                                                                                                                                                                                                                                                                                                                                                                                                                                                                                                                                                                                             | No se cual es el alcance de mi práctica profesional <sup>R</sup>                                             |                          |               |                                   |               |                             |
| 15                                                                                                                                                                                                                                                                                                                                                                                                                                                                                                                                                                                                                                                                                                                                             | Soy responsable de mi práctica profesional                                                                   |                          |               |                                   |               |                             |
| 16                                                                                                                                                                                                                                                                                                                                                                                                                                                                                                                                                                                                                                                                                                                                             | Soy reconocida como profesional por la profesión médica                                                      |                          |               |                                   |               |                             |
| 17                                                                                                                                                                                                                                                                                                                                                                                                                                                                                                                                                                                                                                                                                                                                             | Tengo control sobre mi práctica profesional                                                                  |                          |               |                                   |               |                             |
| 19                                                                                                                                                                                                                                                                                                                                                                                                                                                                                                                                                                                                                                                                                                                                             | No tengo acceso adecuado a los recursos para la formación continuada <sup>R</sup>                            |                          |               |                                   |               |                             |
| 20                                                                                                                                                                                                                                                                                                                                                                                                                                                                                                                                                                                                                                                                                                                                             | Tengo autonomía en mi práctica profesional                                                                   |                          |               |                                   |               |                             |
| 21                                                                                                                                                                                                                                                                                                                                                                                                                                                                                                                                                                                                                                                                                                                                             | No soy escuchada por los miembros del equipo multidisciplinar <sup>R</sup>                                   |                          |               |                                   |               |                             |
| 22                                                                                                                                                                                                                                                                                                                                                                                                                                                                                                                                                                                                                                                                                                                                             | Soy reconocida por mi contribución al cuidado de las mujeres por el colectivo médico                         |                          |               |                                   |               |                             |
| <p>La escala PEMS-e consta de 17 ítems y dos dimensiones-subescalas: “Apoyo organizacional” (ítems nº 1, 5, 6, 7, 8, 9,10 y 19) y “Capacidades propias y trabajo en equipo” (ítems nº 12, 13, 14, 15, 16, 17, 20, 21 y 22).</p> <p>Las preguntas de la escala Likert puntúan de 1 a 5 puntos (1 Totalmente de acuerdo, 2 De acuerdo, 3 Ni de acuerdo ni en desacuerdo, 4 en desacuerdo, 5 totalmente en desacuerdo).Las preguntas número 6,8,10,14,19 y 21 puntúan reverso. Se suman las puntuaciones de cada ítem que componen la dimensión y se divide el resultado entre el número de ítems, por lo que el rango de puntuación para cada dimensión es de uno a cinco. A mayor puntuación, mayor percepción del nivel de empoderamiento.</p> |                                                                                                              |                          |               |                                   |               |                             |

Table S5. Final Spanish Version of *Perceptions of Empowerment in Midwifery Scale (PEMS-e)*
