# Supplementary material for: Cross-Cultural Adaptation and Validation of the Perceptions of Empowerment in Midwifery Scale in the Spanish Context (PEMS-e)
Source: MDPI journal article supplement (doi:10.3390/healthcare11101464), 2023-05-18
Supplement: s1 [file s1]

Table S4 Measure of Sampling Adequacy of the EFA with 22 items.

| <b>Items</b>                                                                                                                                                                                                                                                                                                                                                                                                                                                                                                          | <b><i>Relative Difficulty Index (RDI)</i></b> | <b><i>Measure of Sampling Adequacy (MSA)</i></b> | <b>Bootstrap 95% Confidence Interval (IC95%)</b> |
|-----------------------------------------------------------------------------------------------------------------------------------------------------------------------------------------------------------------------------------------------------------------------------------------------------------------------------------------------------------------------------------------------------------------------------------------------------------------------------------------------------------------------|-----------------------------------------------|--------------------------------------------------|--------------------------------------------------|
| <b>Item 10</b>                                                                                                                                                                                                                                                                                                                                                                                                                                                                                                        | 0.51829                                       | 0.93450                                          | (0.866 - 0.955)                                  |
| <b>Item 8</b>                                                                                                                                                                                                                                                                                                                                                                                                                                                                                                         | 0.55427                                       | 0.93425                                          | (0.845 - 0.942)                                  |
| <b>Item 19</b>                                                                                                                                                                                                                                                                                                                                                                                                                                                                                                        | 0.55854                                       | 0.93845                                          | (0.775 - 0.955)                                  |
| <b>Item 6</b>                                                                                                                                                                                                                                                                                                                                                                                                                                                                                                         | 0.58780                                       | 0.96360                                          | (0.907 - 0.966)                                  |
| <b>Item 21</b>                                                                                                                                                                                                                                                                                                                                                                                                                                                                                                        | 0.58902                                       | 0.94748                                          | (0.888 - 0.956)                                  |
| <b>Item 5</b>                                                                                                                                                                                                                                                                                                                                                                                                                                                                                                         | 0.59512                                       | 0.90958                                          | (0.841 - 0.926)                                  |
| <b>Item 9</b>                                                                                                                                                                                                                                                                                                                                                                                                                                                                                                         | 0.59634                                       | 0.94019                                          | (0.864 - 0.952)                                  |
| <b>Item 22</b>                                                                                                                                                                                                                                                                                                                                                                                                                                                                                                        | 0.60000                                       | 0.87747                                          | (0.789 - 0.900)                                  |
| <b>Item 1</b>                                                                                                                                                                                                                                                                                                                                                                                                                                                                                                         | 0.60671                                       | 0.92941                                          | (0.861 - 0.941)                                  |
| <b>Item 16</b>                                                                                                                                                                                                                                                                                                                                                                                                                                                                                                        | 0.61585                                       | 0.85525                                          | (0.762 - 0.882)                                  |
| <b>Item 7</b>                                                                                                                                                                                                                                                                                                                                                                                                                                                                                                         | 0.62622                                       | 0.92363                                          | (0.781 - 0.945)                                  |
| <b>Item 13</b>                                                                                                                                                                                                                                                                                                                                                                                                                                                                                                        | 0.63780                                       | 0.92994                                          | (0.814 - 0.950)                                  |
| <b>Item 20</b>                                                                                                                                                                                                                                                                                                                                                                                                                                                                                                        | 0.64878                                       | 0.91343                                          | (0.823 - 0.947)                                  |
| <b>Item 17</b>                                                                                                                                                                                                                                                                                                                                                                                                                                                                                                        | 0.73720                                       | 0.87320                                          | (0.749 - 0.902)                                  |
| <b>Item 14</b>                                                                                                                                                                                                                                                                                                                                                                                                                                                                                                        | 0.78171                                       | 0.91762                                          | (0.765 - 0.934)                                  |
| <b>Item 12</b>                                                                                                                                                                                                                                                                                                                                                                                                                                                                                                        | 0.82866                                       | 0.88187                                          | (0.600 - 0.899)                                  |
| <b>Item 15</b>                                                                                                                                                                                                                                                                                                                                                                                                                                                                                                        | 0.92866                                       | 0.79022                                          | (0.571 - 0.833)                                  |
| <p>***Number of items proposed to be removed based on MSA: None</p> <p>Measure of Sampling Adequacy (MSA): Values of MSA below 0.50 suggest that the item does not measure the same domain as the remaining items in the pool, and so that it should be removed.</p> <p>Relative Difficulty Index (RDI): it assesses the position of the items. For a normal-range test, an optimal pool of items should have about 75% RDI values between .40 and .60 and the remaining values evenly distributed in both tails.</p> |                                               |                                                  |                                                  |
